# Supplementary material for: 9-Nitrobenzo[b]quinolizinium as a fluorogenic probe for the detection of nitroreductase in vitro and in Escherichia coli
Source: Royal Society of Chemistry journal article supplement (doi:10.1039/d1nj05230f), 2021-11-30
Supplement: d1nj05230f1.pdf [file d1nj05230f1.pdf]

## 9-Nitrobenzo[*b*]quinolizinium as Fluorogenic Probe for the Detection of Nitroreductase *in vitro* and in *Escherichia coli*

Peter Jonas Wickhorst, Heiko Ihmels, Melanie Marianne Lammert-Baumgartner, Mareike Müller, and Holger Schönherr

(submitted to *New J. Chem.*)

### Electronic Supporting Information

#### Table of Contents

|                                                  |     |
|--------------------------------------------------|-----|
| 1. Equipment                                     | S2  |
| 2. Materials                                     | S2  |
| 3. Synthesis                                     | S3  |
| 4. Determination of fluorescence quantum yields  | S4  |
| 5. Calculation of theoretical absorption spectra | S5  |
| 6. Spectrometric measurements                    | S6  |
| 7. Fluorimetric analysis of bacteria             | S9  |
| 8. Toxicity testing                              | S11 |
| 9. NMR spectra                                   | S12 |
| 10. References                                   | S13 |

## 1. Equipment

Absorption spectra: Analytik Jena Specord S600 spectrophotometer and Varian Cary 100 Bio spectrophotometer with baseline correction. Emission spectra: Varian Cary Eclipse spectrophotometer at 20 °C: Cuvettes: Quartz cells (10 mm x 4 mm). NMR spectra: Jeol ECZ 500 ( $^1\text{H}$ : 500 MHz,  $^{13}\text{C}$ : 125 MHz) at 25 °C ( $\text{DMSO-}d_6$ ). NMR spectra were processed with the software MestReNova and referenced to the residual solvent signal of  $\text{DMSO-}d_5$  ( $^1\text{H}$ :  $\delta = 2.50$ ,  $^{13}\text{C}$ :  $\delta = 39.5$ ). Elemental analyses data: HEKAtech EUROEA combustion analyser, by Rochus Breuer, Organische Chemie I, Universität Siegen. Melting points (uncorrected): BÜCHI 545 (BÜCHI, Flawil, CH), Tecan Reader Safire (Männedorf, Switzerland)

## 2. Materials

9-Nitrobenzo[*b*]quinolizinium perchlorate (**1b**),<sup>[1]</sup> 2-(4-nitrostyryl)quinolizinium tetrafluoroborate (**2**)<sup>[2]</sup> and benzo[*b*]quinolizinium-9-boronic acid bromide (**5**)<sup>[3]</sup> were prepared according to published procedures.<sup>[1]</sup> Nitroreductase from *Escherichia coli* (>100 units/mg),  $\beta$ -nicotinamide adenine dinucleotide, as disodium salt hydrate, and 4-nitroiodobenzene (**6**) were purchased from SigmaAldrich (St. Louis, USA). All solutions were prepared in PBS buffer (10 mM  $\text{Na}_2\text{HPO}_4$ , 1.8 mM  $\text{KH}_2\text{PO}_4$ , 2.7 mM KCl, 137 mM NaCl), Tris-HCl buffer (dilution from 1 M Tris-HCl stock buffer, pH 8.5 from jenabioscience 0.05 M and titration with HCl to pH 7.4), LB-agar (Lysogeny broth agar, Luria/Miller, Carl Roth, Karlsruhe, Germany), LB (Lysogeny broth, Luria/Miller, Carl Roth, Karlsruhe, Germany). All buffer solutions and media were prepared from purified water (resistivity 18 M $\Omega$  cm) and biochemistry-grade chemicals. The buffer solutions were filtered through a PVDF membrane filter (pore size 0.45  $\mu\text{m}$ ) prior to use.

### 3. Synthesis

The novel compound **1d** was synthesized by a Suzuki-Miyaura coupling reaction according to published standard procedure for benzo[*b*]quinolizinium derivatives.<sup>[3]</sup>

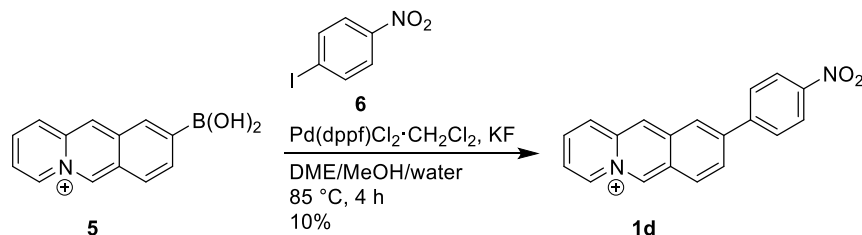

**Scheme S1.** Synthesis of 9-(4-nitrophenyl)benzo[*b*]quinolizinium (**1d**).

#### 9-(4-Nitrophenyl)benzo[*b*]quinolizinium (**1d**).

A mixture of benzo[*b*]quinolizinium-9-boronic acid bromide (**5**) (152 mg, 500 μmol), 4-nitroiodobenzene (**6**) (156 mg, 625 μmol), Pd(dppf)Cl<sub>2</sub>·CH<sub>2</sub>Cl<sub>2</sub> (20 mg) and KF (116 mg, 2.00 mmol) in DME/water/MeOH (2:1:1, 6 ml) was stirred for 4 h at 85 °C under argon gas atmosphere. After cooling to r.t. the reaction mixture was diluted with MeOH (20 ml) and filtered, and aq. NaBF<sub>4</sub> solution (sat. 1.0 ml) was added to the filtrate. The precipitate was filtered off and the crude solid product was purified by column chromatography (SiO<sub>2</sub>; CH<sub>2</sub>Cl<sub>2</sub>/MeOH, 9:1 v/v) to give product **1d** as red amorphous solid (19.4 mg, 50.0 μmol, 10%); mp 291–293 °C. – <sup>1</sup>H NMR (500 MHz, DMSO-*d*<sub>6</sub>): 8.00 (dt, <sup>3</sup>*J* = 7 Hz, <sup>4</sup>*J* = 1 Hz, 1H, 3-H), 8.12 (s, <sup>3</sup>*J* = 7 Hz, <sup>4</sup>*J* = 1 Hz, 1H, 2-H), 8.29 (d, <sup>3</sup>*J* = 9 Hz, 2H, 3'-H, 5'-H), 8.43 (d, <sup>3</sup>*J* = 9 Hz, 1H, 8-H), 8.46 (d, <sup>3</sup>*J* = 9 Hz, 2H, 2'-H, 6'-H), 8.63 (d, <sup>3</sup>*J* = 9 Hz, 1H, 7-H), 8.66 (d, <sup>3</sup>*J* = 9 Hz, 1H, 1-H), 8.86 (s, 1H, 10-H), 9.26 (s, 1H, 11-H), 9.31 (d, <sup>3</sup>*J* = 7 Hz, 1H, 4-H), 10.46 (s, 1H, 6-H). – <sup>13</sup>C NMR (125 MHz, DMSO-*d*<sub>6</sub>): δ = 122.6 (C6a), 124.4 (C2', C6'), 125.3 (C10), 125.5 (C11), 127.0 (C1), 129.1 (C3', C5'), 129.2 (C3), 129.3 (C7), 130.1 (C8), 131.5 (C2), 134.6 (C4), 135.4 (C10a), 138.0 (C11a), 140.2 (C6), 142.8 (C9), 144.1 (C4'), 147.9 (C1'). – El. Anal. for C<sub>19</sub>H<sub>13</sub>BF<sub>4</sub>N<sub>2</sub>O<sub>2</sub> x 0.5 H<sub>2</sub>O, calc. (%): C 57.46, H 3.55, N 7.05 found (%): C 57.01, H 3.25, N 6.76.

#### 4. Determination of fluorescence quantum yields

Solutions were prepared for each measurement as described above from stock solutions of **1b** in MeCN ( $c = 1.0$  mM). For the detection of fluorescence spectra, the excitation and emission slits were adjusted to 5 nm, and the excitation wavelengths were fixed to 415 nm. The relative fluorescence quantum yields of **1b** were determined under identical conditions (detection wavelength, excitation wavelength, detector voltage, slit bandwidths, collection rate). The quantum yield,  $\Phi_{fl}$ , was determined according to equation 1.

$$\Phi_{fl, X} = \frac{F_X A_S}{F_S A_X} \cdot \frac{n_X^2}{n_S^2} \cdot \Phi_{fl, S} \quad (\text{eq. 1})$$

The indices X and S indicate the analyte (X) and standard (S) solution.

$\Phi$  = Emission quantum yield.

$F$  = Integral of the emission curve.

$A$  = Absorbance at the excitation wavelength.

$n$  = Refraction index of the solution.

Measurements were performed with coumarin 153 in ethanol as standard ( $\Phi_{fl} = 0.544$ ).<sup>[4]</sup>

The estimated error is ca. 10% of the given values.

## 5. Calculation of theoretical absorption spectra

The optimized structure, transition energies, as well as the corresponding oscillator strengths were obtained from time dependent DFT calculations [O3LYP]<sup>[5]</sup> with def2-TZVP as basis set for an aqueous solution of **4** (Figure S1, Table S1). Solvent properties were simulated with the polarized continuum model (PCM).<sup>[5]</sup> The calculations were performed with ORCA Software.<sup>[6]</sup> The input files for ORCA and plots of molecular orbitals were generated with Avogadro.<sup>[7]</sup>

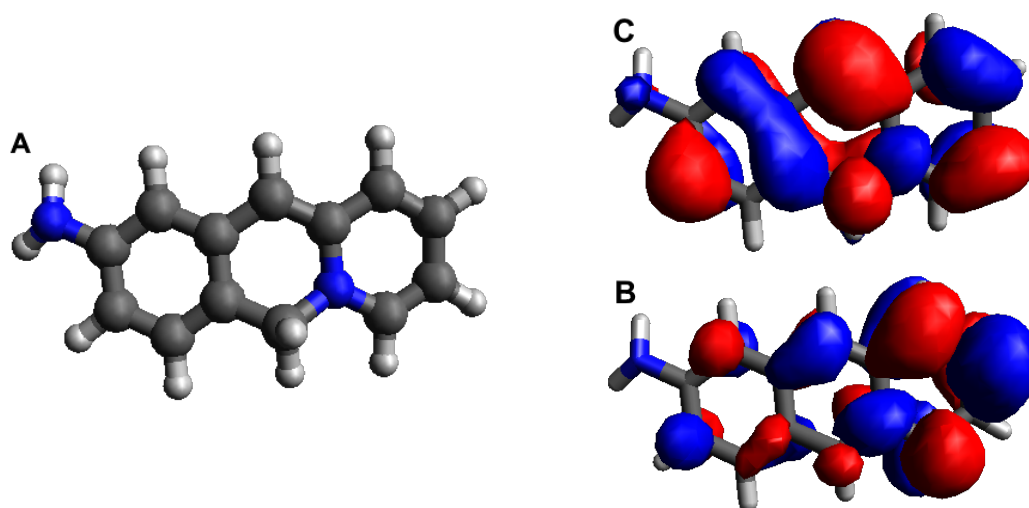

**Figure S1.** Optimized structure (A) and plots of the molecular orbitals of the HOMO (B) and LUMO (C) of compound **4**.

**Table S1.** Wavelength,  $\lambda$  and oscillator strength,  $f$ , of the first 10 electronic transitions of derivative **4**.

| Transition               | $\lambda$ / nm | $f$  |
|--------------------------|----------------|------|
| $S_0 \rightarrow S_1$    | 478            | 0.08 |
| $S_0 \rightarrow S_2$    | 338            | 0.17 |
| $S_0 \rightarrow S_3$    | 334            | 0.35 |
| $S_0 \rightarrow S_4$    | 283            | 0.06 |
| $S_0 \rightarrow S_5$    | 247            | 0.01 |
| $S_0 \rightarrow S_6$    | 245            | 0.03 |
| $S_0 \rightarrow S_7$    | 236            | 0.20 |
| $S_0 \rightarrow S_8$    | 236            | 0.28 |
| $S_0 \rightarrow S_9$    | 229            | 0.04 |
| $S_0 \rightarrow S_{10}$ | 222            | 0.01 |

## 6. Spectrometric measurements

The absorption, emission and CD spectra were determined according to published procedures.<sup>[8,9]</sup>

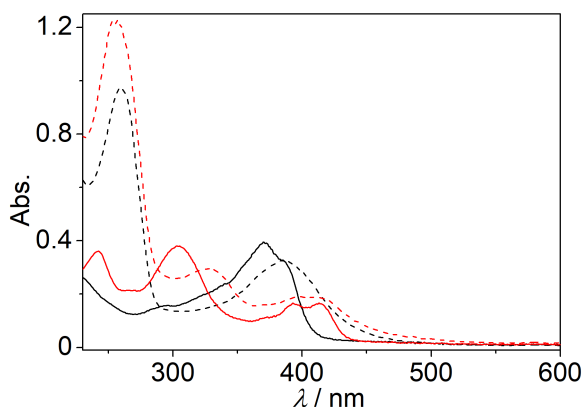

**Figure S2.** Absorption before (solid) and after (dashed) reaction of probe **1d** (black) and **2** (red,  $c = 10 \mu\text{M}$ ) with nitroreductase (5 µg/ml) and NADH (50 µM) in PBS buffer (pH = 7,  $T = 37^\circ\text{C}$ ) for 40 min;  $\lambda_{\text{ex}} = 400 \text{ nm}$ .

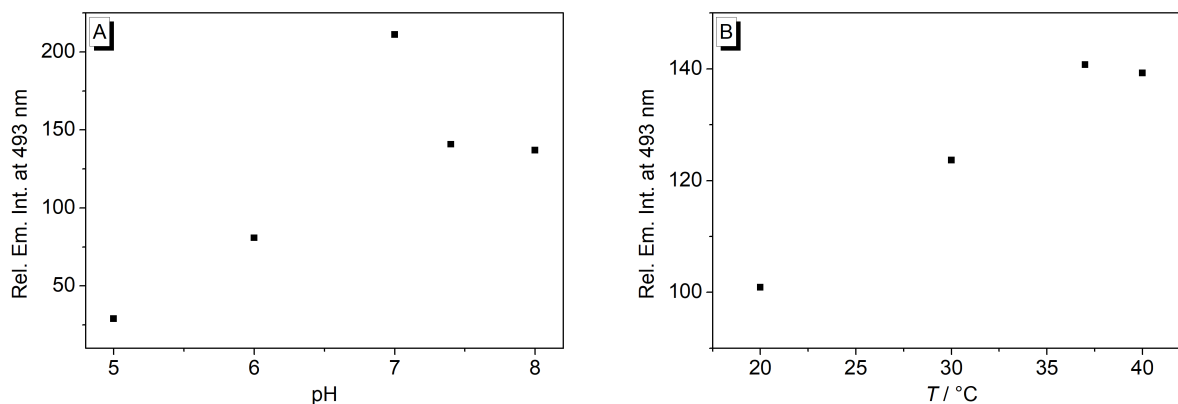

**Figure S3.** Relative emission intensity after incubation of **1b** (10 µM) with nitroreductase (5 µg/ml) and NADH (50 µM) for 40 min in PBS buffer at different pH (A,  $T = 37^\circ\text{C}$ ) and different temperatures (B, pH = 7);  $\lambda_{\text{ex}} = 415 \text{ nm}$ .

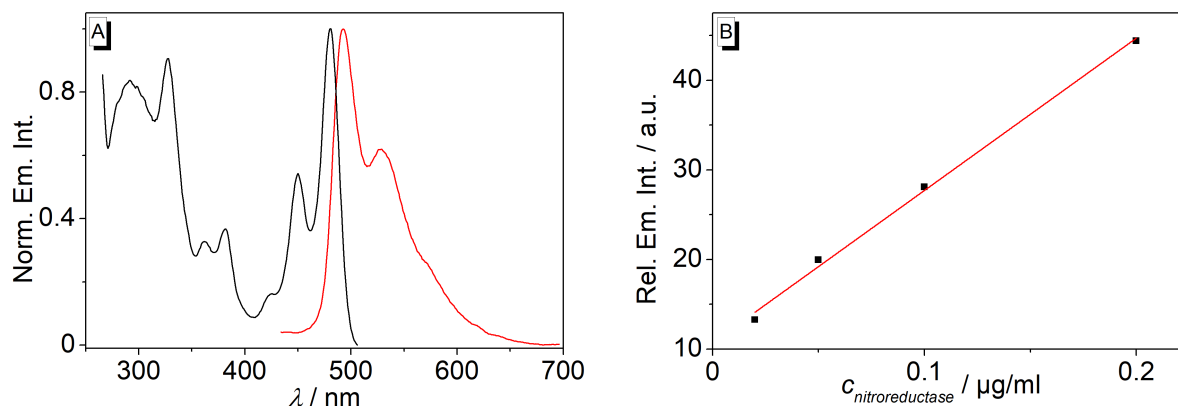

**Figure S4.** A: Normalized emission (red) and excitation spectrum (black) after incubation of probe **1b** ( $c = 10 \mu\text{M}$ ) with nitroreductase ( $5 \mu\text{g/ml}$ ) and NADH ( $50 \mu\text{M}$ ) in PBS buffer ( $\text{pH} = 7$ ,  $T = 37^\circ\text{C}$ ) for 40 min;  $\lambda_{\text{ex}} = 415 \text{ nm}$ ,  $\lambda_{\text{fl}} = 520 \text{ nm}$ . B: Plot of the fluorescence intensity at 490 nm versus nitroreductase concentration after incubation for 60 min. The red line represents the best fit to the theoretical model.

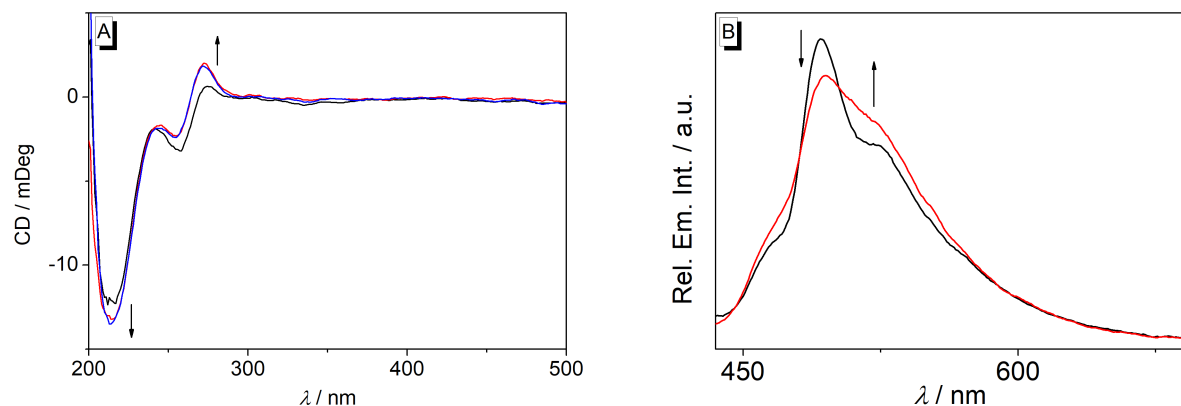

**Figure S5.** A: CD spectra after incubation of probe **1b** ( $c = 10 \mu\text{M}$ ) with NADH ( $50 \mu\text{M}$ ) and nitroreductase ( $5 \mu\text{g/ml}$ ) for 0 min (black), 40 min (blue) and 80 min (red). B: Change of the emission after incubation of probe **1b** ( $c = 10 \mu\text{M}$ ) with nitroreductase ( $5 \mu\text{g/ml}$ ) and NADH ( $50 \mu\text{M}$ ) in PBS buffer ( $\text{pH} = 7$ ,  $T = 37^\circ\text{C}$ ) for 40 min before (black) and after incubation with acetamide ( $100 \mu\text{M}$ ) for 16 h (red);  $\lambda_{\text{ex}} = 415 \text{ nm}$ . The arrows indicate changes of the absorption (A) and emission (B) with increasing reaction time.

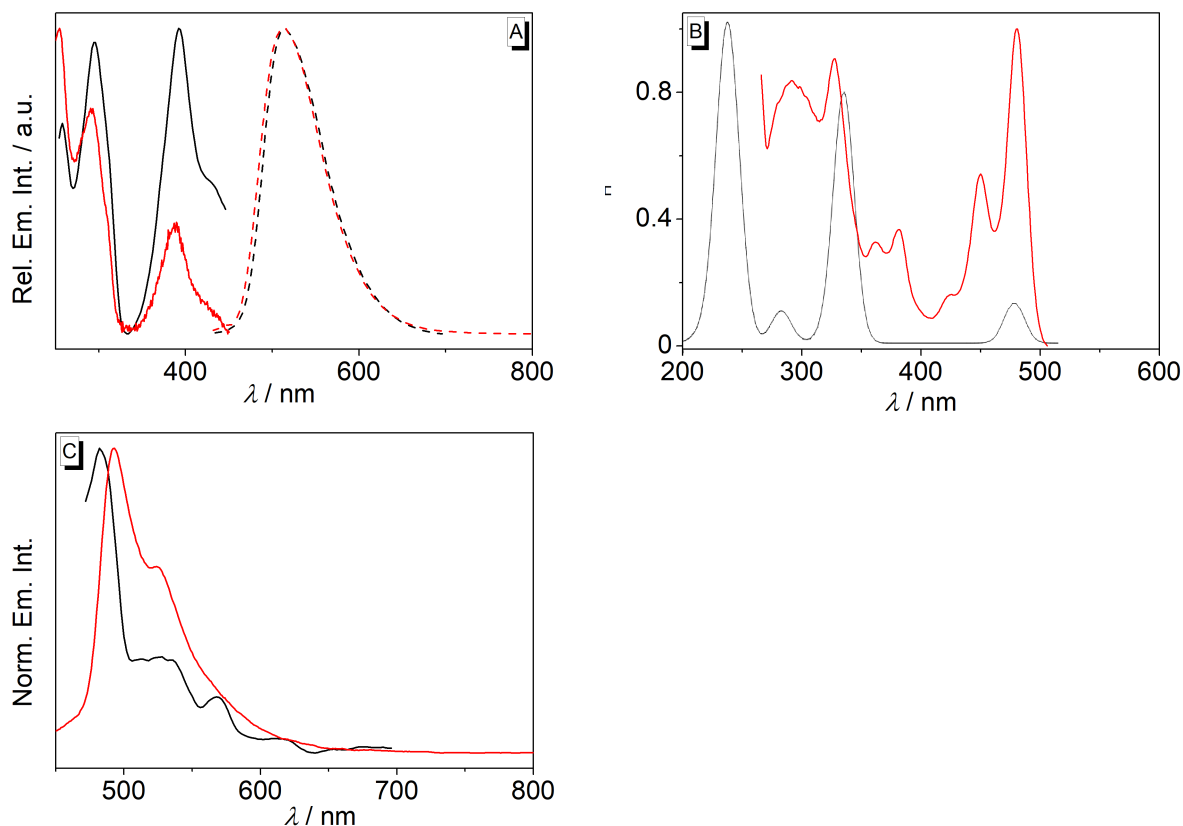

**Figure S6.** A: Normalized emission (dashed) and excitation spectrum (bold) of 9-aminobenzo[b]quinolizinium (**1c**, black) and after incubation of probe **1b** ( $c = 10 \mu\text{M}$ ) with nitroreductase (5  $\mu\text{g/ml}$ ) and NADH (50  $\mu\text{M}$ ) in PBS buffer (pH = 7,  $T = 37^\circ\text{C}$ ) for 40 min and subsequent storage of the isolated product under aerobic conditions for one day;  $\lambda_{\text{ex}} = 415 \text{ nm}$ ,  $\lambda_{\text{fl}} = 515 \text{ nm}$ . B: Excitation spectrum after reduction of probe **1b** (red,  $c = 10 \mu\text{M}$ ) by nitroreductase and predicted absorption spectrum of the proposed product **4** (black);  $\lambda_{\text{fl}} = 520 \text{ nm}$ . C: Emission spectrum after reduction of probe **1b** by nitroreductase (red) and  $\text{NaBH}_4$  (black);  $\lambda_{\text{ex}} = 415 \text{ nm}$ .

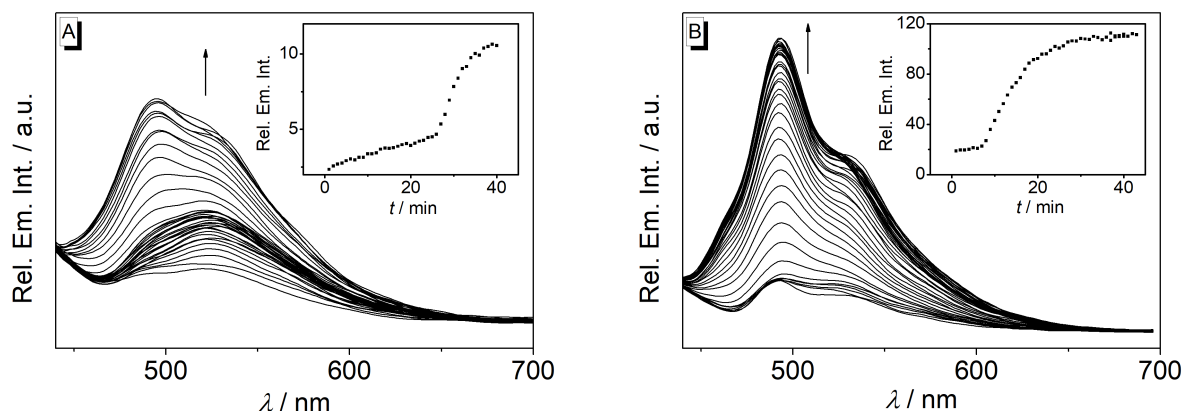

**Figure S7.** Change of the emission during the reaction of probe **1b** [ $c_{1b} = 2.5 \mu\text{M}$  (A),  $c_{1b} = 5 \mu\text{M}$  (B)] with nitroreductase (5  $\mu\text{g/ml}$ ) and NADH (50  $\mu\text{M}$ ) in PBS buffer (pH = 7,  $T = 37^\circ\text{C}$ );  $\lambda_{\text{ex}} = 415 \text{ nm}$ . The arrows indicate the changes of emission with increasing reaction time. Inset: Plot of the probe emission at 493 nm versus reaction time.

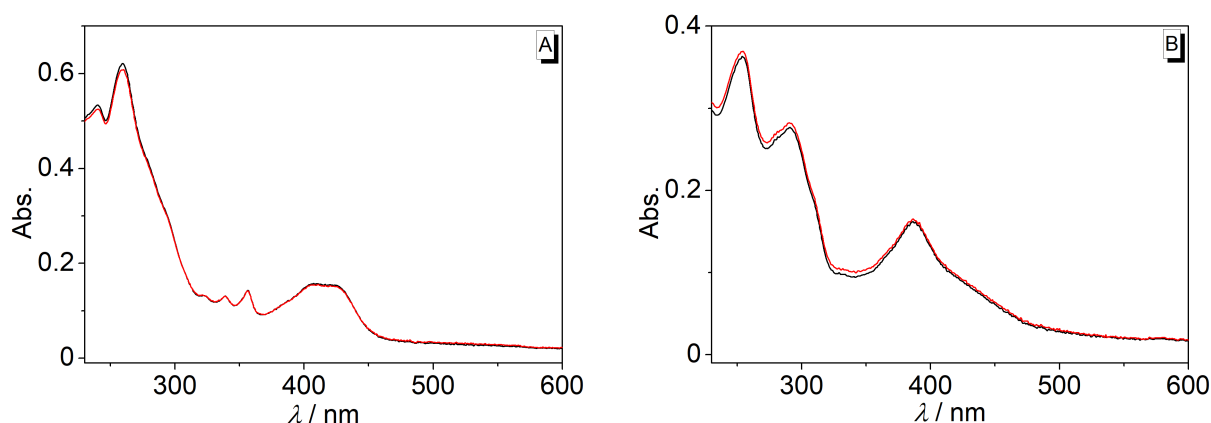

**Figure S8.** Absorption spectra of derivatives **1b** (A) and **1c** (B) in PBS buffer (pH = 7,  $T = 37\text{ }^{\circ}\text{C}$ ) before (black) and after (red) irradiation for 30 min with blue light ( $\lambda = 420\text{ nm}$ ).

## 7. Fluorimetric analysis of NRT activity in live bacteria

The NTR activity was conducted according to the procedure described before by Brennecke et al.<sup>[10]</sup> As a test the nonpathogenic *Escherichia coli* W (ATCC9637) derivative Mach1™ (T1 Phage-resistant, chemical competent, purchased from Invitrogen, USA) was used.<sup>[11]</sup> *E. coli* colonies from Luria-Bertani (LB) agar plate were transferred to 5 ml LB for overnight cultures (16-20 h) at  $37\text{ }^{\circ}\text{C}$  and 200 rpm. The bacteria were harvested by centrifugation and the resulting pellet was washed by addition of 0.05 M Tris-HCl buffer (pH 7.4) with equal volume compared to the harvested culture. This washing step was repeated a second time and the bacterial pellet finally resuspended in less than half of the initial volume 0.05 M Tris-HCl buffer in order to adjust the optical density (OD) of the bacterial suspension to  $OD_{600} \approx 2.0$  (Figure S8A und C) or dilute the suspension further with Tris-HCl buffer to  $OD_{600} \approx$  of 0.2 (Figure S8B and Fig 4). The adjusted bacterial suspension was distributed in transparent 6 well plates (Sarstedt, Nümbrecht, Germany) á 2 ml and in addition to untreated control conditions the probe **1b** (stock concentration 10 mM in DMSO) was diluted 500-fold to a final concentration of 20  $\mu\text{M}$  in the bacterial culture and incubated for 4 h or 24 h at 120 rpm and  $37\text{ }^{\circ}\text{C}$ .

150  $\mu\text{l}$  of these cultures have been transferred to 96 well plates (black, flat bottom, media binding, Sarstedt, Nümbrecht, Germany) for fluorimetric analysis with a multimode microplate reader (Tecan Safire, monochromator) at timepoints 0 h, 4 h, 24 h. 96well plates were sealed with transparent microplate sealing foil (AMPLISEAL, Greiner

Bio-One, Frickenhausen, Germany) and all experimental conditions were performed in technical replicates.

Pictures of fluorescence light-up of bacterial cultures incubated with 20  $\mu\text{M}$  probe **1b** for 4 h in the 6 well plates (Fig 4A) have been documented via an in house built black box equipped with 365 nm LED lights.

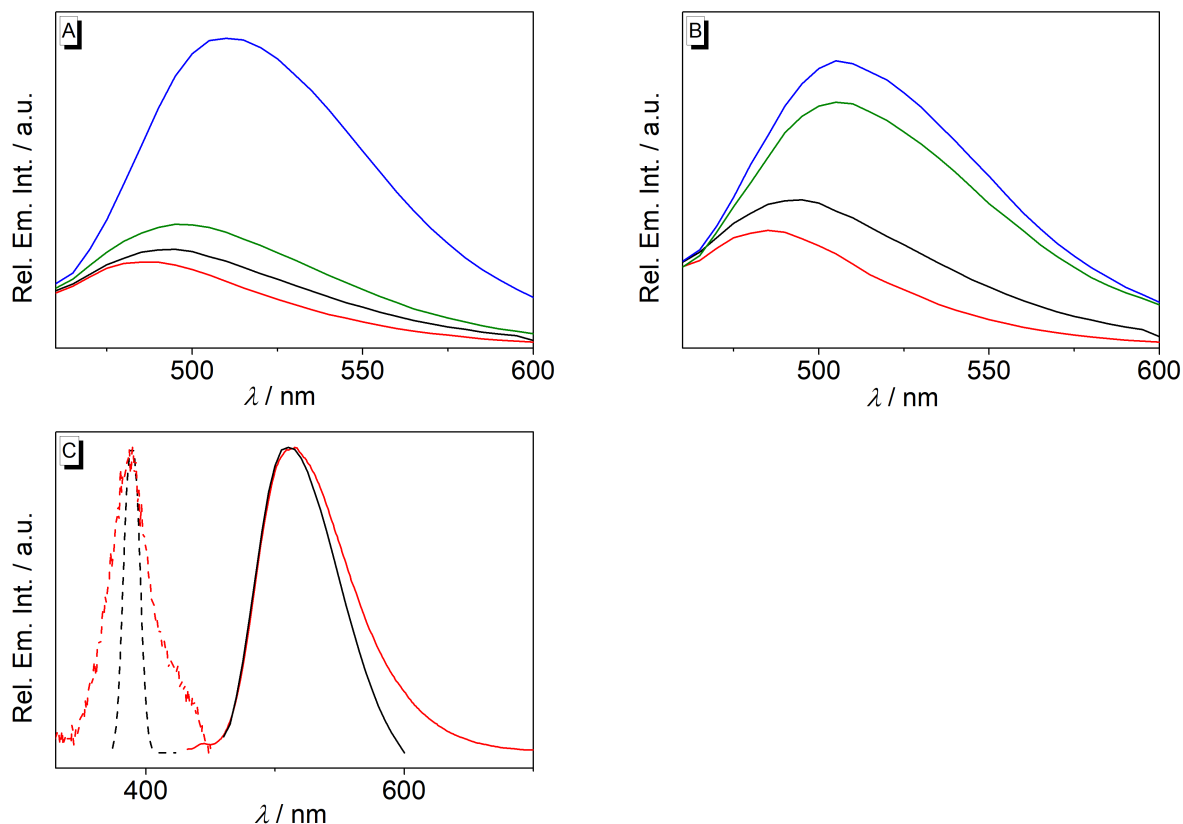

**Figure S9.** Relative emission intensity of *E. coli* cultures with an optical density of  $OD_{600} = 2$  (A) and  $OD_{600} = 0.2$  (B) before (red) and after incubation with **1b** ( $c = 20 \mu\text{M}$ ) in Tris-HCl buffer for 4 h (green) and 24 h (blue) and the relative emission intensity of a pure solute of **1b** ( $c = 20 \mu\text{M}$ ) in Tris-HCl buffer (black);  $\lambda_{\text{ex}} = 399 \text{ nm}$ . C: Normalized emission (bold) and excitation spectrum (dashed) of 9-aminobenzo[*b*]quinolizinium (**1c**, red;  $\lambda_{\text{ex}} = 415 \text{ nm}$ ,  $\lambda_{\text{fl}} = 515 \text{ nm}$ ) and after incubation of *Escherichia coli* cell cultures ( $OD_{600} = 2$ ) with **1b** ( $c = 20 \mu\text{M}$ ) in TRIS- buffer for 24 h (black;  $\lambda_{\text{ex}} = 399 \text{ nm}$ ,  $\lambda_{\text{em}} > 460 \text{ nm}$ ).

## 8. Toxicity testing

*E. coli* Mach1™ cultures were harvested as described in section 7 by centrifugation and adjusted to an  $OD_{600} \approx$  of 0.2, re-suspended in 0.05 M Tris-HCl buffer (pH 7.4) with or without the probe **1b** (20  $\mu$ M) and incubated 4 h or 24 h at 120 rpm and 37 °C. Subsequently, the bacteria suspensions were collected followed by the determination of the concentration of viable bacteria by CFU plate counting method. Suspensions were diluted serially up to  $10^5$  fold and  $10^6$  fold. Droplets of 50  $\mu$ L were plated in duplicates onto LB agar plates and visible and colonies (CFUs) were counted after 24 h incubation at 37 °C.

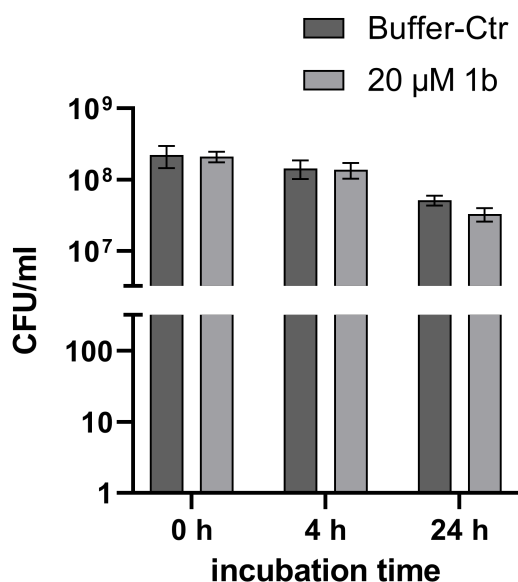

**Figure S10.** Determination of colony forming units (CFU) / ml as measure for the viability of *E. coli* cultures with an optical density of  $OD_{600} = 0.2$  incubated in either Tris-HCl buffer (Buffer-Ctr) or probe **1b** ( $c = 20 \mu$ M) in Tris-HCl buffer at incubation starting time (0 h), 4 h or 24 h at 37 °C. Error bars indicate standard deviation (SD) of the mean of at least 3, and max. 4 technical replicates of CFU counts.

## 8. NMR Spectra

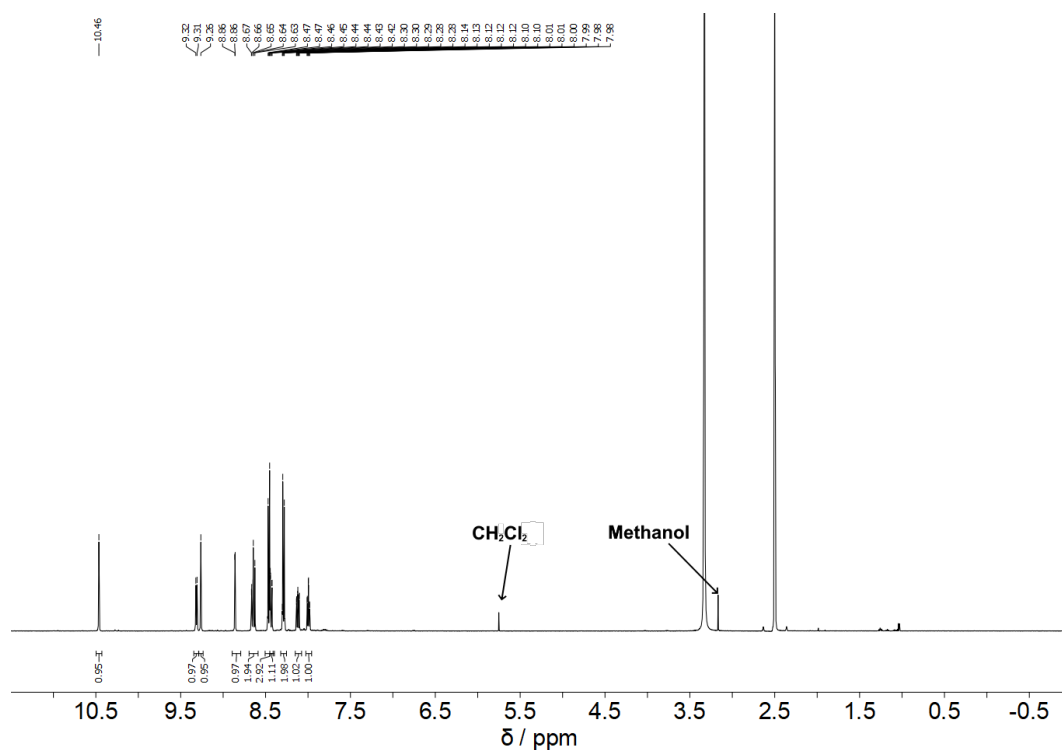

**Figure S11.** <sup>1</sup>H NMR spectrum (500 MHz) of derivative **1d** in DMSO-*d*<sub>6</sub>.

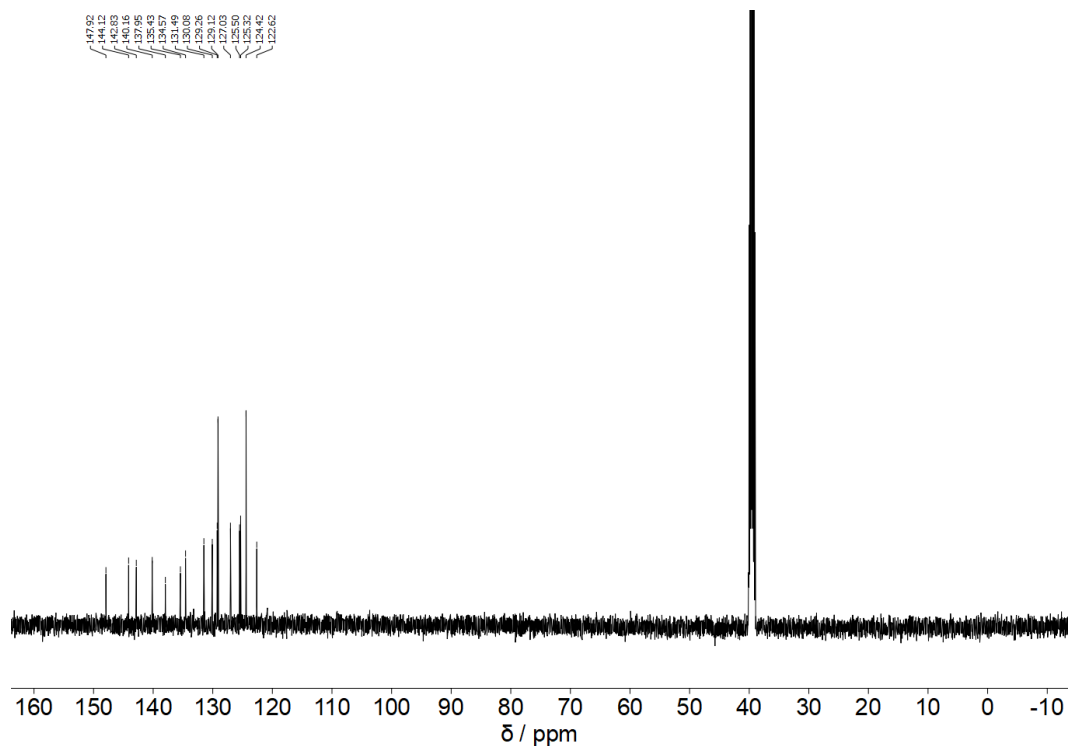

**Figure S12.** <sup>13</sup>C NMR spectrum (125 MHz) of derivative **1d** in DMSO-*d*<sub>6</sub>.

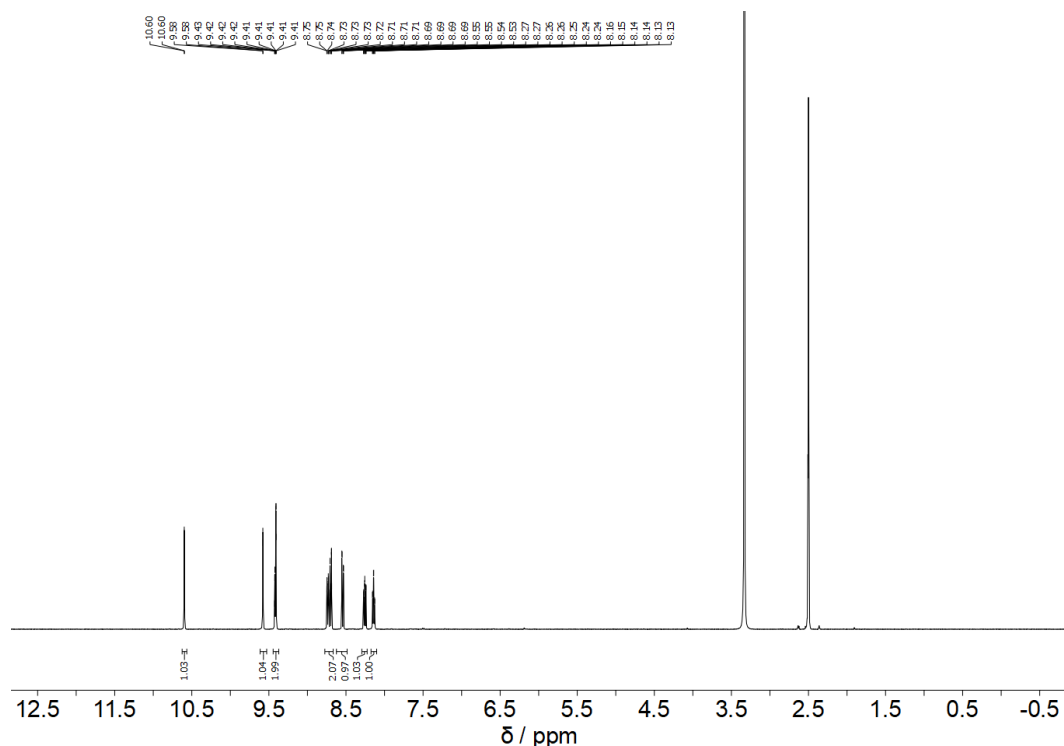

**Figure S13.**  $^1\text{H}$  NMR spectrum (500 MHz) of derivative **1b** in  $\text{DMSO}-d_6$ .

## 9 References

- [1] C. K. Bradsher and J. C. Parham, *J. Heterocycl. Chem.*, 1964, **1**, 30.
- [2] S. Kölsch, H. Ihmels, J. Mattay, N. Sewald and B. O. Patrick, *Beilstein J. Org. Chem.*, 2020, **16**, 111.
- [3] M. Tian and H. Ihmels, *Synthesis*, 2009, **24**, 4226.
- [4] K. Rurack and M. Spieles, *Anal. Chem.*, 2011, **83**, 1232.
- [5] J. B. Foresman and A. Frisch, *Exploring chemistry with electronic structure methods*, Gaussian Inc, Wallingford, CT USA, **2015**.
- [6] (a) F. Neese, *Wiley Interdiscip. Rev.-Comput. Mol. Sci.*, 2018, **8**; (b) F. Neese, *WIREs Comput. Mol. Sci.*, 2012, **2**, 73.
- [7] M. D. Hanwell, D. E. Curtis, D. C. Lonie, T. Vandermeersch, E. Zurek and G. R. Hutchison, *J. Cheminform.*, 2012, **4**, 17.
- [8] J. Zhang, H.-W. Liu, X.-X. Hu, J. Li, L.-H. Liang, X.-B. Zhang and W. Tan, *Anal. Chem.*, 2015, **87**, 11832.
- [9] R. Bortolozzi, H. Ihmels, L. Thomas, M. Tian and G. Viola, *Chem. Eur. J.*, 2013, **19**, 8736.
- [10] B. Brennecke, Q. Wang, Q. Zhang, H.-Y. Hu and M. Nazaré, *Angew. Chem.*, 2020, **132**, 8590.
- [11] F. R. Bloom, B. J. Schmidt and J.-J. Lin, *Rapid Growing Microorganisms for Biotechnology Applications*. US 6709852 B1, **2004**.
